# Supplementary material
Source: PubMed Central journal article supplement (PMC4907863)
Supplement: NIHMS783552-supplement-supplement_1.pdf [file NIHMS783552-supplement-supplement_1.pdf]

**Supplemental Table 1. Association between childhood abuse and migraine during pregnancy**

| Childhood abuse                  | No migraine<br>(N = 1973) |      | Probable migraine<br>(N = 626) |      |                           |                                      | Migraine<br>(N = 371) |      |                           |                                      |
|----------------------------------|---------------------------|------|--------------------------------|------|---------------------------|--------------------------------------|-----------------------|------|---------------------------|--------------------------------------|
|                                  | n                         | %    | n                              | %    | Unadjusted OR<br>(95% CI) | Adjusted OR<br>(95% CI) <sup>a</sup> | n                     | %    | Unadjusted OR<br>(95% CI) | Adjusted OR<br>(95% CI) <sup>a</sup> |
| No abuse                         | 599                       | 30.4 | 162                            | 25.9 | Reference                 | Reference                            | 78                    | 21.0 | Reference                 | Reference                            |
| Any abuse                        | 1374                      | 69.6 | 464                            | 74.1 | 1.25 (1.02, 1.53)         | 1.20 (0.98, 1.48)                    | 293                   | 79.0 | 1.64 (1.25, 2.14)         | 1.47 (1.12, 1.93)                    |
| Types of abuse                   |                           |      |                                |      |                           |                                      |                       |      |                           |                                      |
| No abuse                         | 599                       | 30.4 | 162                            | 25.9 | Reference                 | Reference                            | 78                    | 21.0 | Reference                 | Reference                            |
| Physical abuse only              | 771                       | 39.1 | 239                            | 38.2 | 1.15 (0.91, 1.44)         | 1.12 (0.89, 1.41)                    | 138                   | 37.2 | 1.38 (1.02, 1.85)         | 1.30 (0.96, 1.75)                    |
| Sexual abuse only                | 156                       | 7.9  | 42                             | 6.7  | 1.00 (0.68, 1.46)         | 0.96 (0.65, 1.40)                    | 35                    | 9.4  | 1.72 (1.11, 2.66)         | 1.53 (0.98, 2.39)                    |
| Physical & sexual abuse          | 447                       | 22.7 | 183                            | 29.2 | 1.51 (1.19, 1.93)         | 1.44 (1.12, 1.86)                    | 120                   | 32.3 | 2.06 (1.51, 2.81)         | 1.76 (1.27, 2.42)                    |
| Number of childhood abuse events |                           |      |                                |      |                           |                                      |                       |      |                           |                                      |
| 0                                | 599                       | 30.4 | 162                            | 25.9 | Reference                 | Reference                            | 78                    | 21.0 | Reference                 | Reference                            |
| 1                                | 407                       | 20.6 | 105                            | 16.8 | 0.95 (0.72, 1.25)         | 0.93 (0.70, 1.23)                    | 60                    | 16.2 | 1.13 (0.79, 1.61)         | 1.12 (0.78, 1.61)                    |
| 2                                | 240                       | 12.2 | 79                             | 12.6 | 1.21 (0.89, 1.65)         | 1.22 (0.90, 1.67)                    | 46                    | 12.4 | 1.47 (0.99, 2.17)         | 1.36 (0.91, 2.02)                    |
| 3                                | 387                       | 19.6 | 139                            | 22.2 | 1.32 (1.02, 1.71)         | 1.29 (0.99, 1.68)                    | 88                    | 23.7 | 1.72 (1.23, 2.39)         | 1.54 (1.10, 2.16)                    |
| 4                                | 159                       | 8.1  | 57                             | 9.1  | 1.32 (0.93, 1.87)         | 1.25 (0.88, 1.78)                    | 33                    | 8.9  | 1.59 (1.02, 2.47)         | 1.41 (0.90, 2.21)                    |
| 5                                | 101                       | 5.1  | 48                             | 7.7  | 1.75 (1.19, 2.57)         | 1.70 (1.15, 2.52)                    | 27                    | 7.3  | 2.04 (1.26, 3.32)         | 1.72 (1.05, 2.83)                    |
| 6-8                              | 80                        | 4.1  | 36                             | 5.8  | 1.66 (1.08, 2.55)         | 1.58 (1.02, 2.45)                    | 39                    | 10.5 | 3.73 (2.38, 5.84)         | 3.23 (2.04, 5.13)                    |
| <i>P</i> -value for linear trend |                           |      |                                |      | <0.0001                   | 0.0006                               |                       |      | <0.0001                   | <0.0001                              |

Odds ratios were calculated using multinomial logistic regression.

Abbreviations: OR, odds ratio; CI, confidence interval

<sup>a</sup> Adjusted for maternal age, maternal ethnicity, and lifetime intimate partner violence

Supplemental Figure 1. Odds ratio (aOR) and 95% confidence intervals (95%) of migraine (red) and probable migraine (blue) in relation to number of childhood abuse events

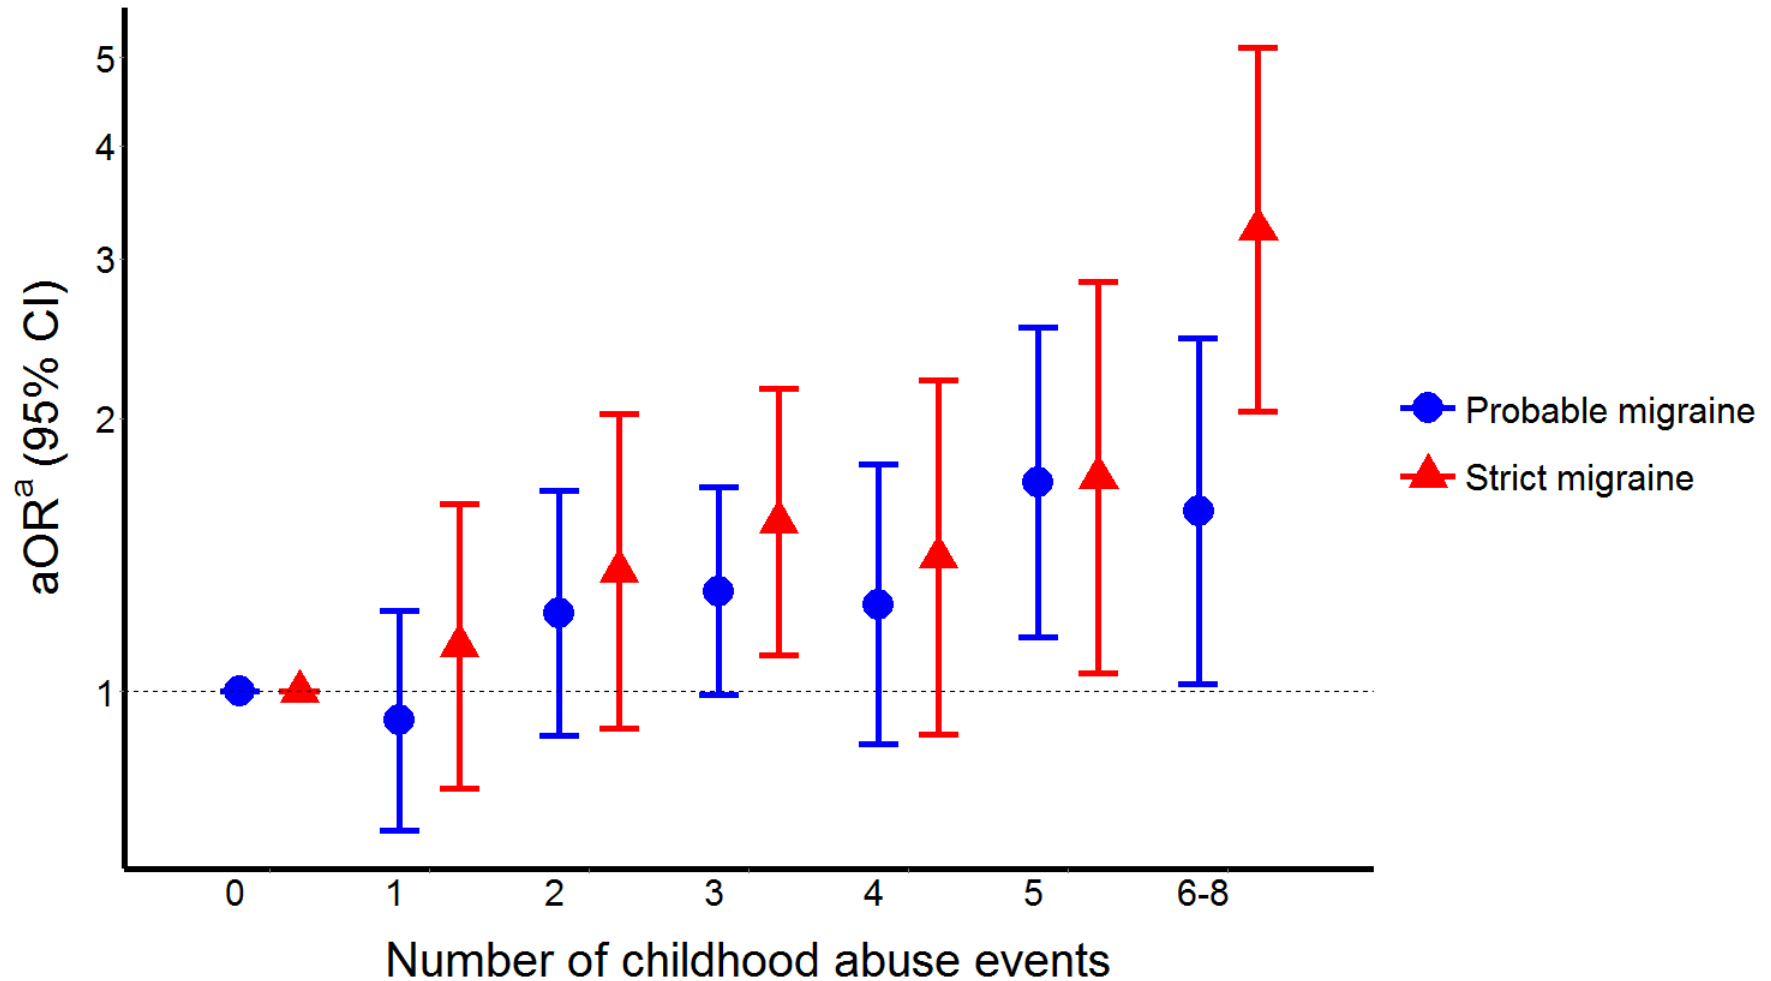

Abbreviations: aOR, adjusted odds ratio; CI, confidence interval

<sup>a</sup> Adjusted for age, ethnicity, and IPV history

$P_{trend}=0.0006$  for migraine and  $<0.0001$  for probable migraine
